# Supplementary material for: Multi-Run Concrete Autoencoder to Identify Prognostic lncRNAs for 12 Cancers
Source: MDPI journal article supplement (doi:10.3390/ijms222111919), 2021-11-03
Supplement: s1 [file s1]

## Supplementary 4: Survival Analysis (Forest Plots)

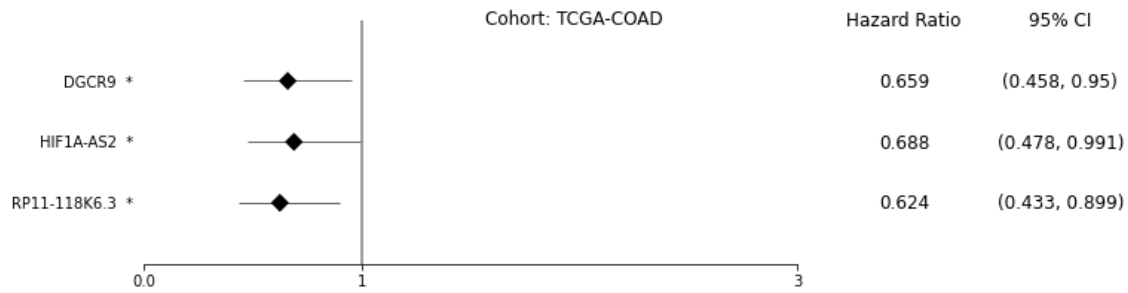

**Figure 1:** Forest plot of survival analysis with significant lncRNAs on TCGA-COAD cohort. The asterisks represent the Log-rank P-values: (\* -  $P \leq 0.05$ )

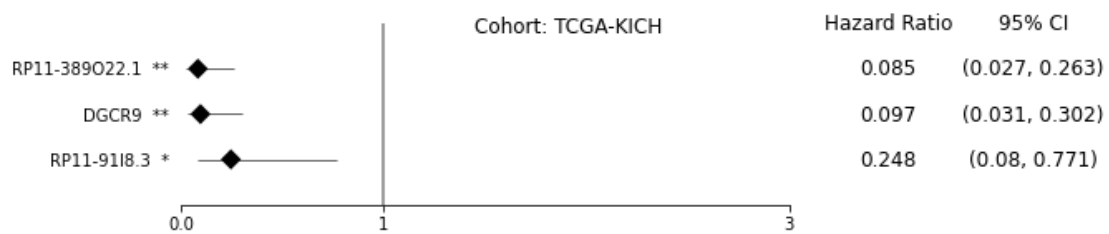

**Figure 2:** Forest plot of survival analysis with significant lncRNAs on TCGA-KICH cohort. The asterisks represent the Log-rank P-values: (\* -  $P \leq 0.05$ , \*\* -  $P \leq 0.01$ )

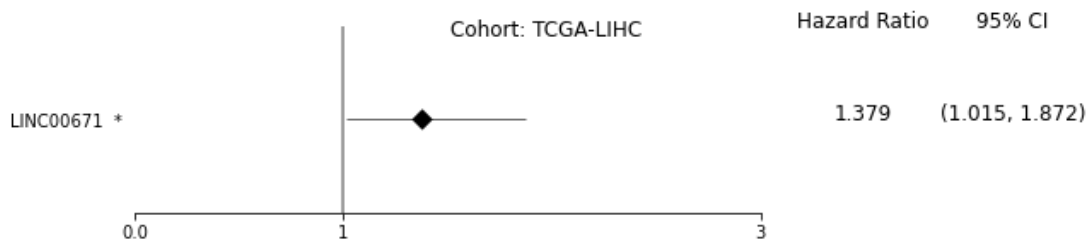

**Figure 3:** Forest plot of survival analysis with significant lncRNAs on TCGA-LIHC cohort. The asterisks represent the Log-rank P-values: (\* -  $P \leq 0.05$ )

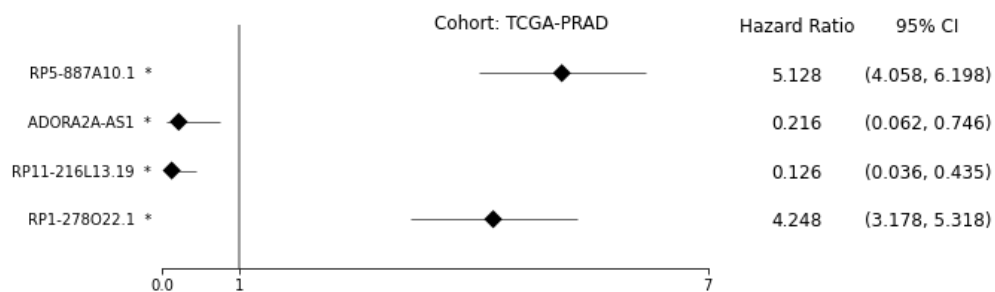

**Figure 4:** Forest plot of survival analysis with significant lncRNAs on TCGA-PRAD cohort. The asterisks represent the Log-rank P-values: (\* -  $P \leq 0.05$ )

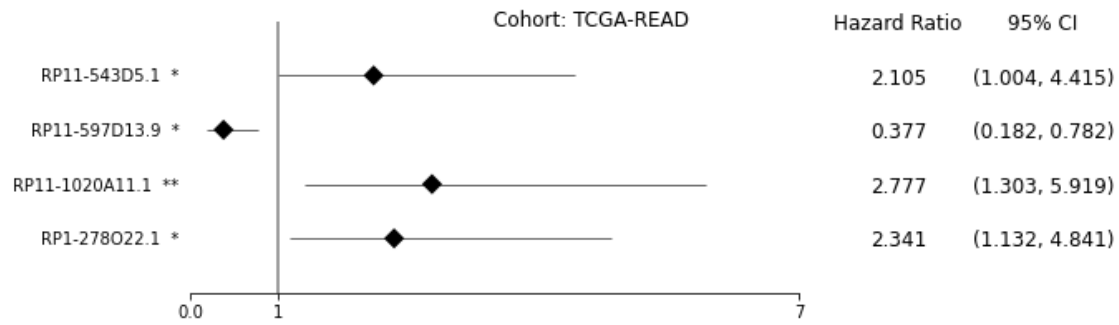

**Figure 5:** Forest plot of survival analysis with significant lncRNAs on TCGA-READ cohort. The asterisks represent the Log-rank P-values: (\* -  $P \leq 0.05$ , \*\* -  $P \leq 0.01$ )

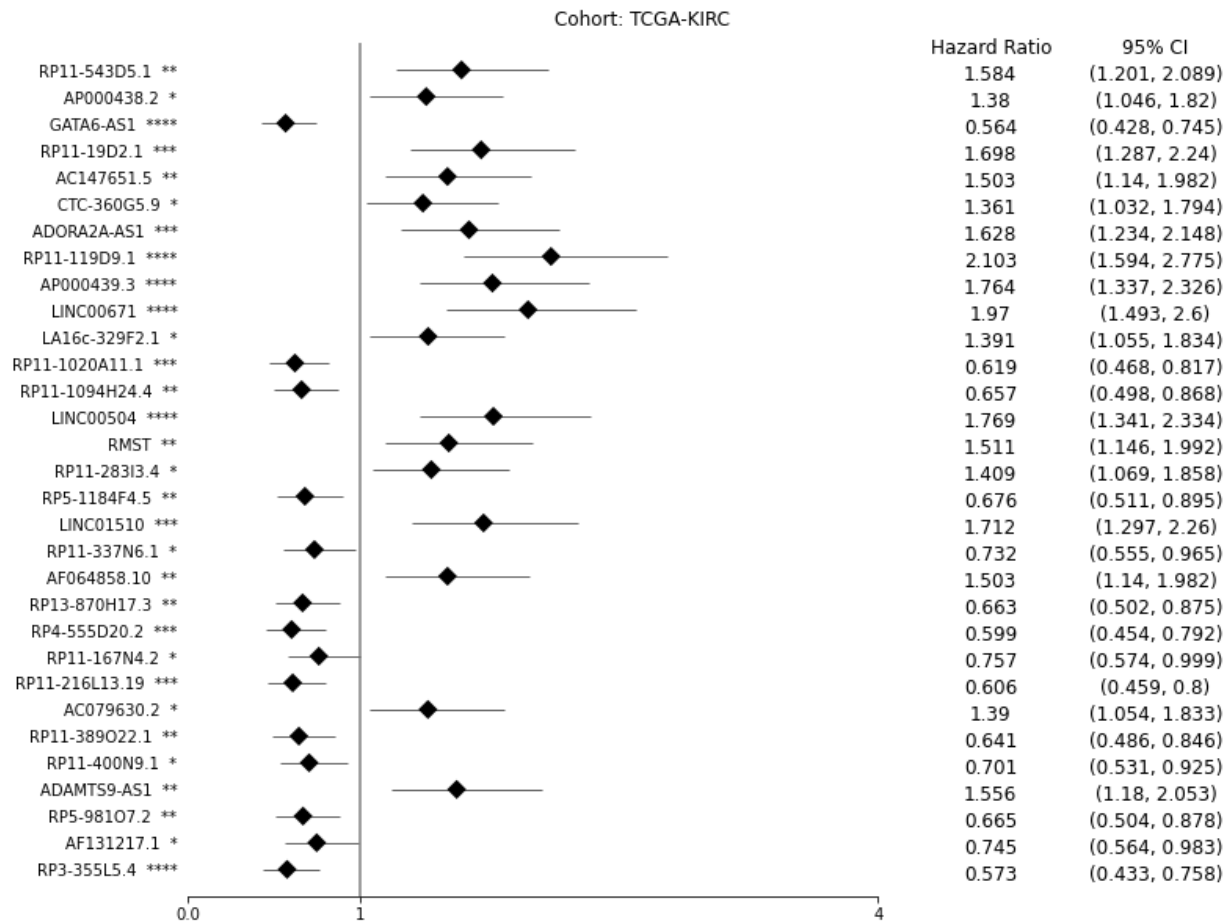

**Figure 6:** Forest plot of survival analysis with significant lncRNAs on TCGA-KIRC cohort. The asterisks represent the Log-rank P-values: (\* -  $P \leq 0.05$ , \*\* -  $P \leq 0.01$ , \*\*\* -  $P \leq 0.001$ , \*\*\*\* -  $P \leq 0.0001$ )

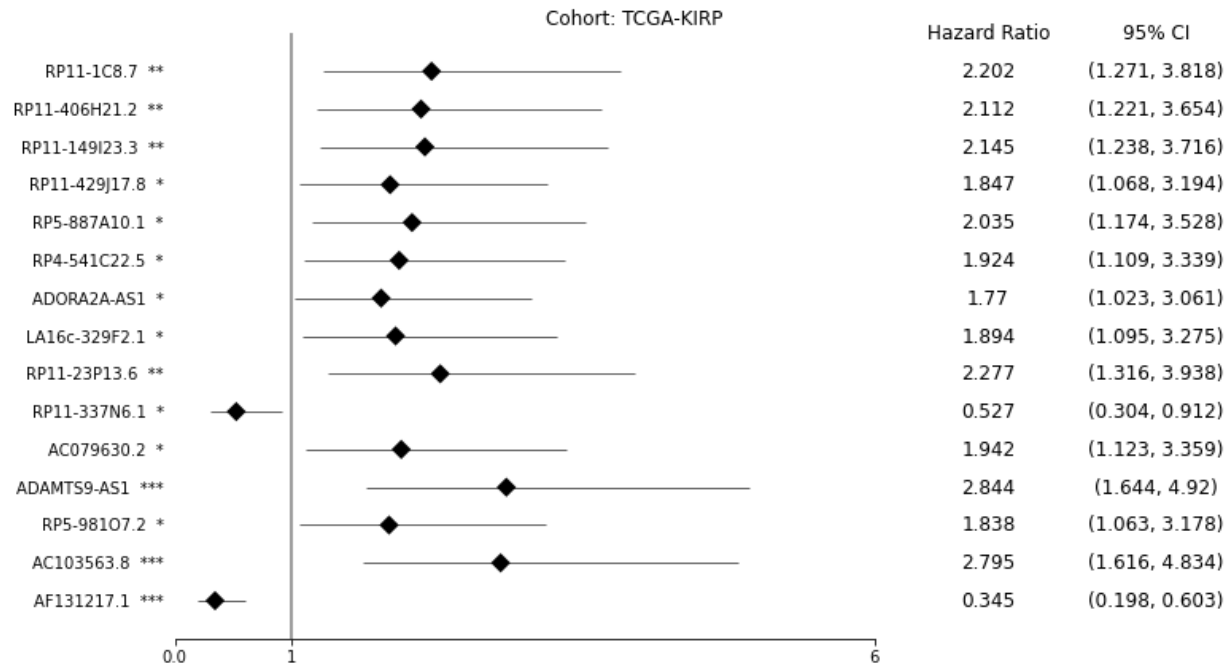

**Figure 7:** Forest plot of survival analysis with significant lncRNAs on TCGA-KIRP cohort. The asterisks represent the Log-rank P-values: (\* -  $P \leq 0.05$ , \*\* -  $P \leq 0.01$ , \*\*\* -  $P \leq 0.001$ )

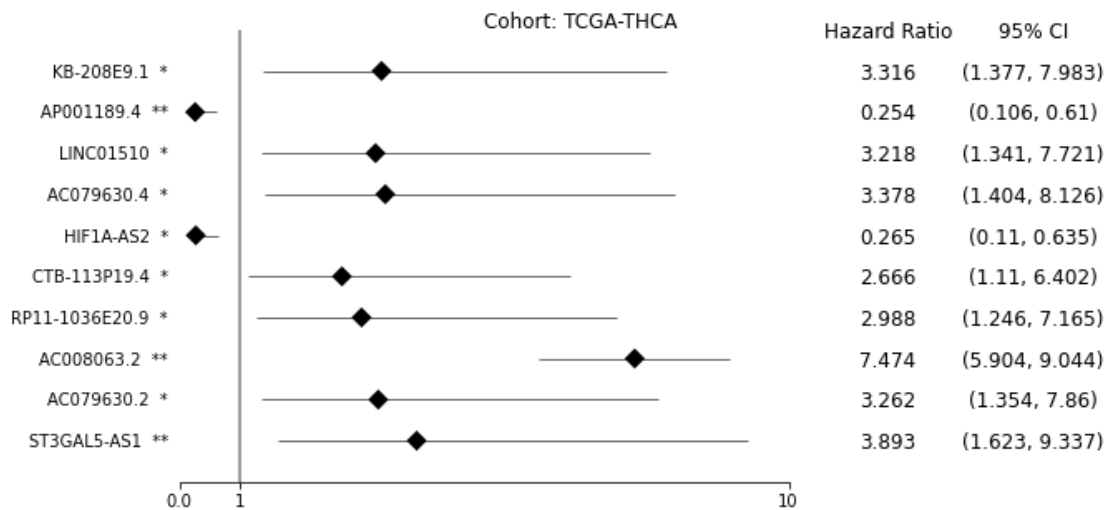

**Figure 8:** Forest plot of survival analysis with significant lncRNAs on TCGA-THCA cohort. The asterisks represent the Log-rank P-values: (\* -  $P \leq 0.05$ , \*\* -  $P \leq 0.01$ )

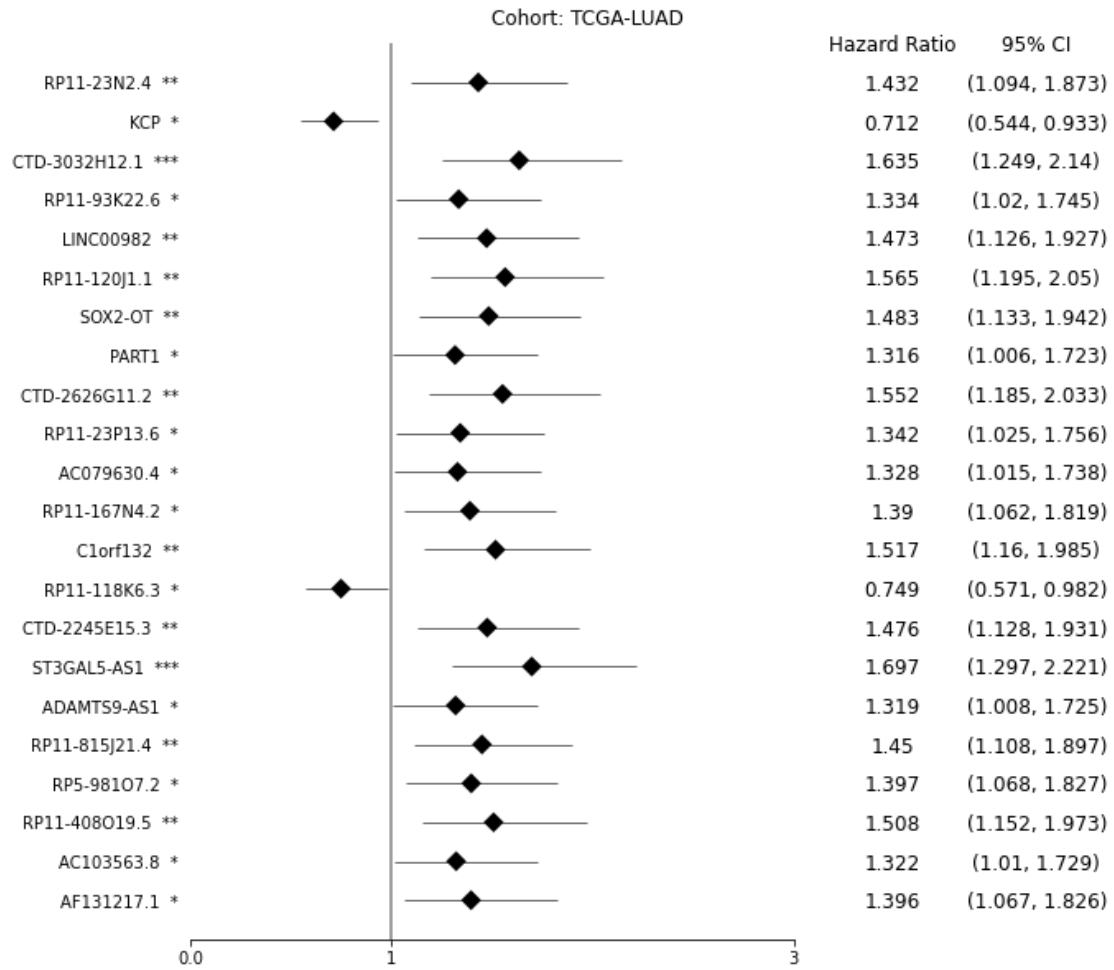

**Figure 9:** Forest plot of survival analysis with significant lncRNAs on TCGA-LUAD cohort. The asterisks represent the Log-rank P-values: (\* -  $P \leq 0.05$ , \*\* -  $P \leq 0.01$ , \*\*\* -  $P \leq 0.001$ )

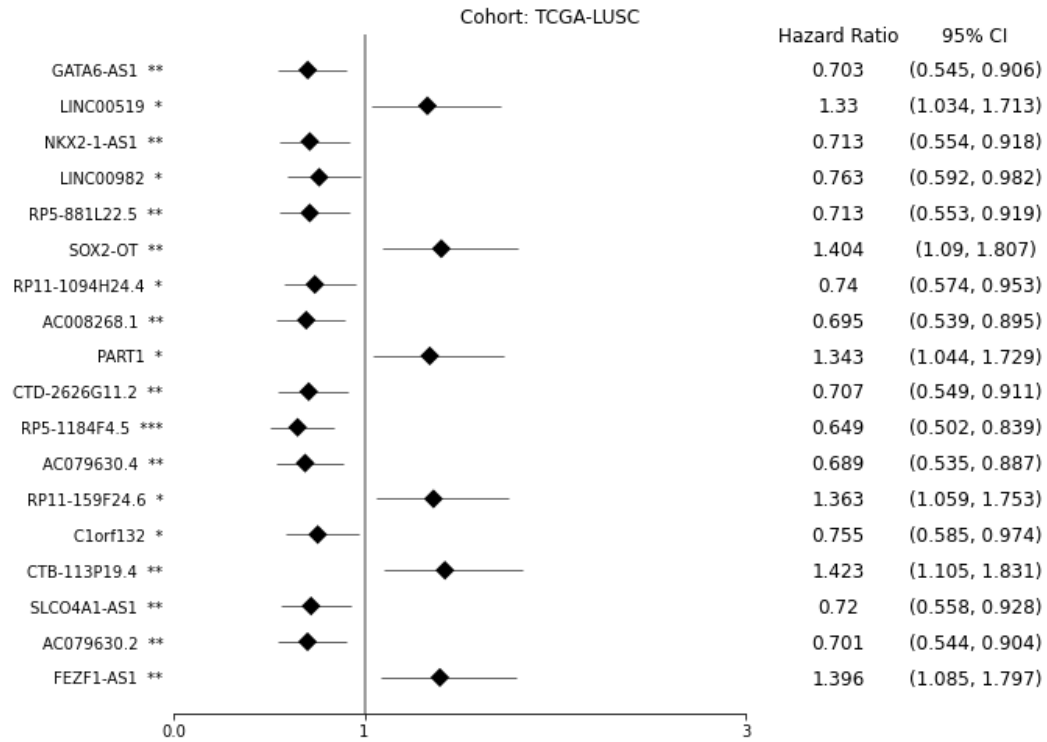

**Figure 10:** Forest plot of survival analysis with significant lncRNAs on TCGA-LUSC cohort. The asterisks represent the Log-rank P-values: (\* -  $P \leq 0.05$ , \*\* -  $P \leq 0.01$ , \*\*\* -  $P \leq 0.001$ )
