# Supplementary material for: Multi-Run Concrete Autoencoder to Identify Prognostic lncRNAs for 12 Cancers
Source: MDPI journal article supplement (doi:10.3390/ijms222111919), 2021-11-03
Supplement: s1 [file s1]

## Supplementary 2: Comparing tumor features with normal features

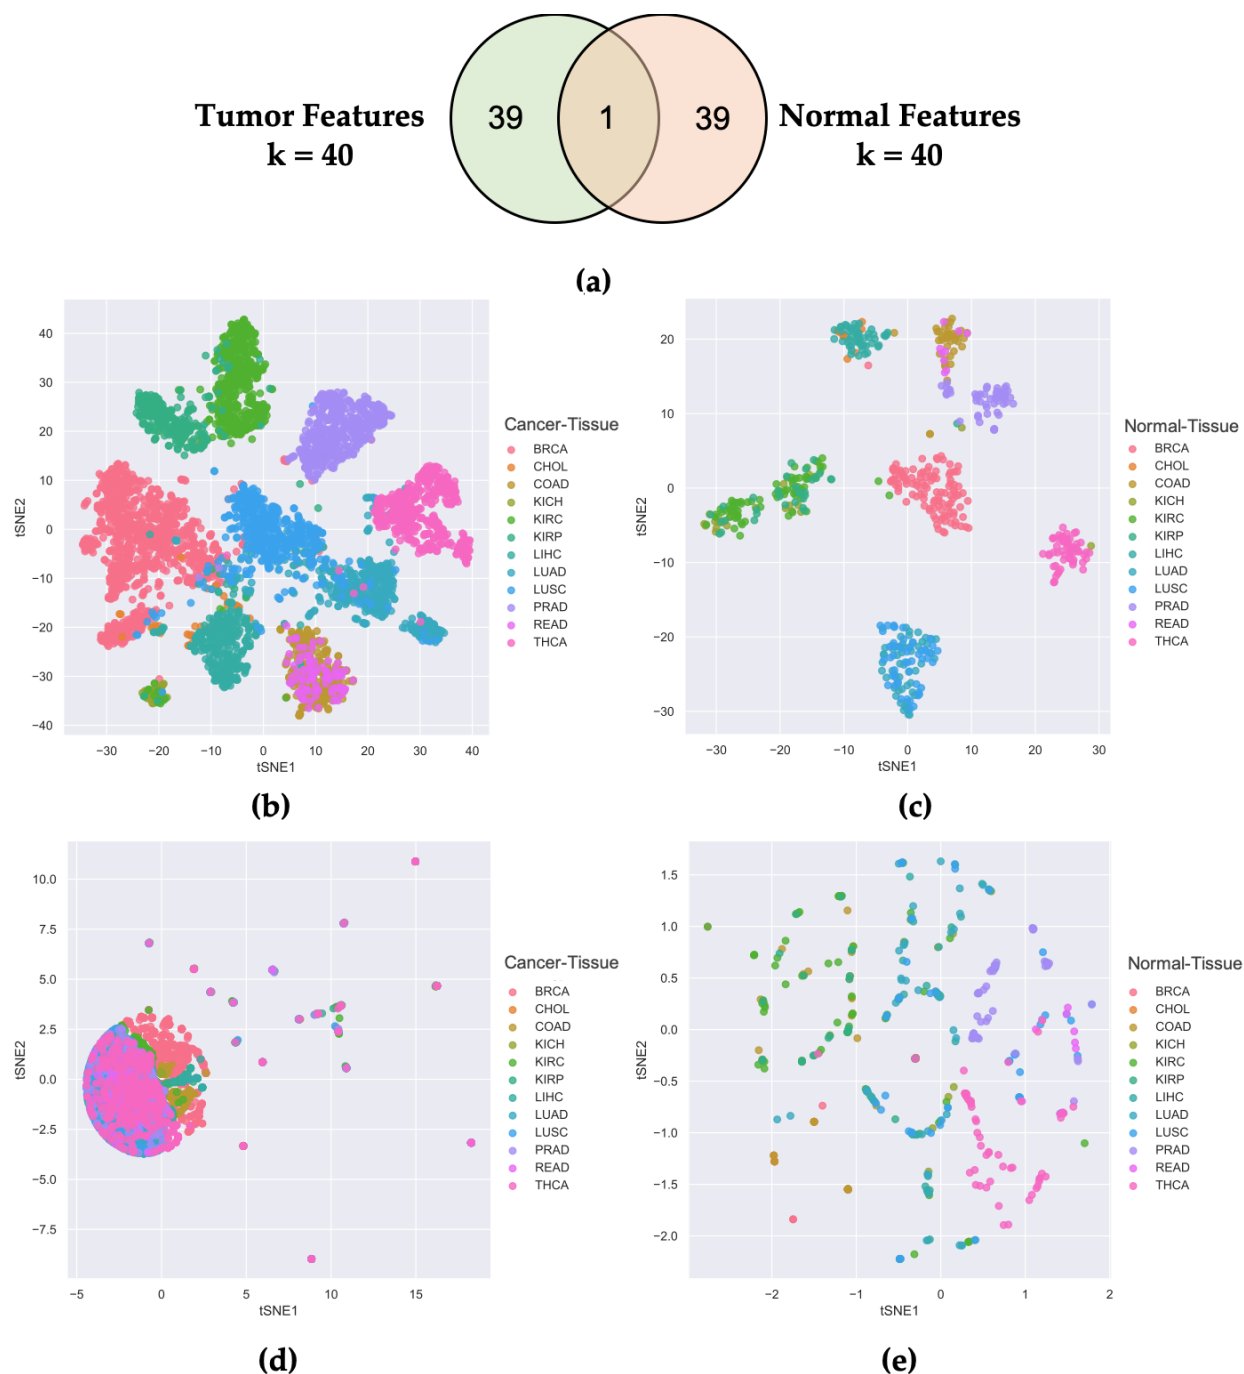

**Figure 1. Comparing tumor features with normal features.** a) Venn diagram of top 40 tumor features and top 40 normal features derived from CAE; b) t-SNE plot of tumor samples using tumor features; c) t-SNE plot of normal samples using normal features; d) t-SNE plot of tumor samples using normal features; e) t-SNE plot of normal samples using tumor features.

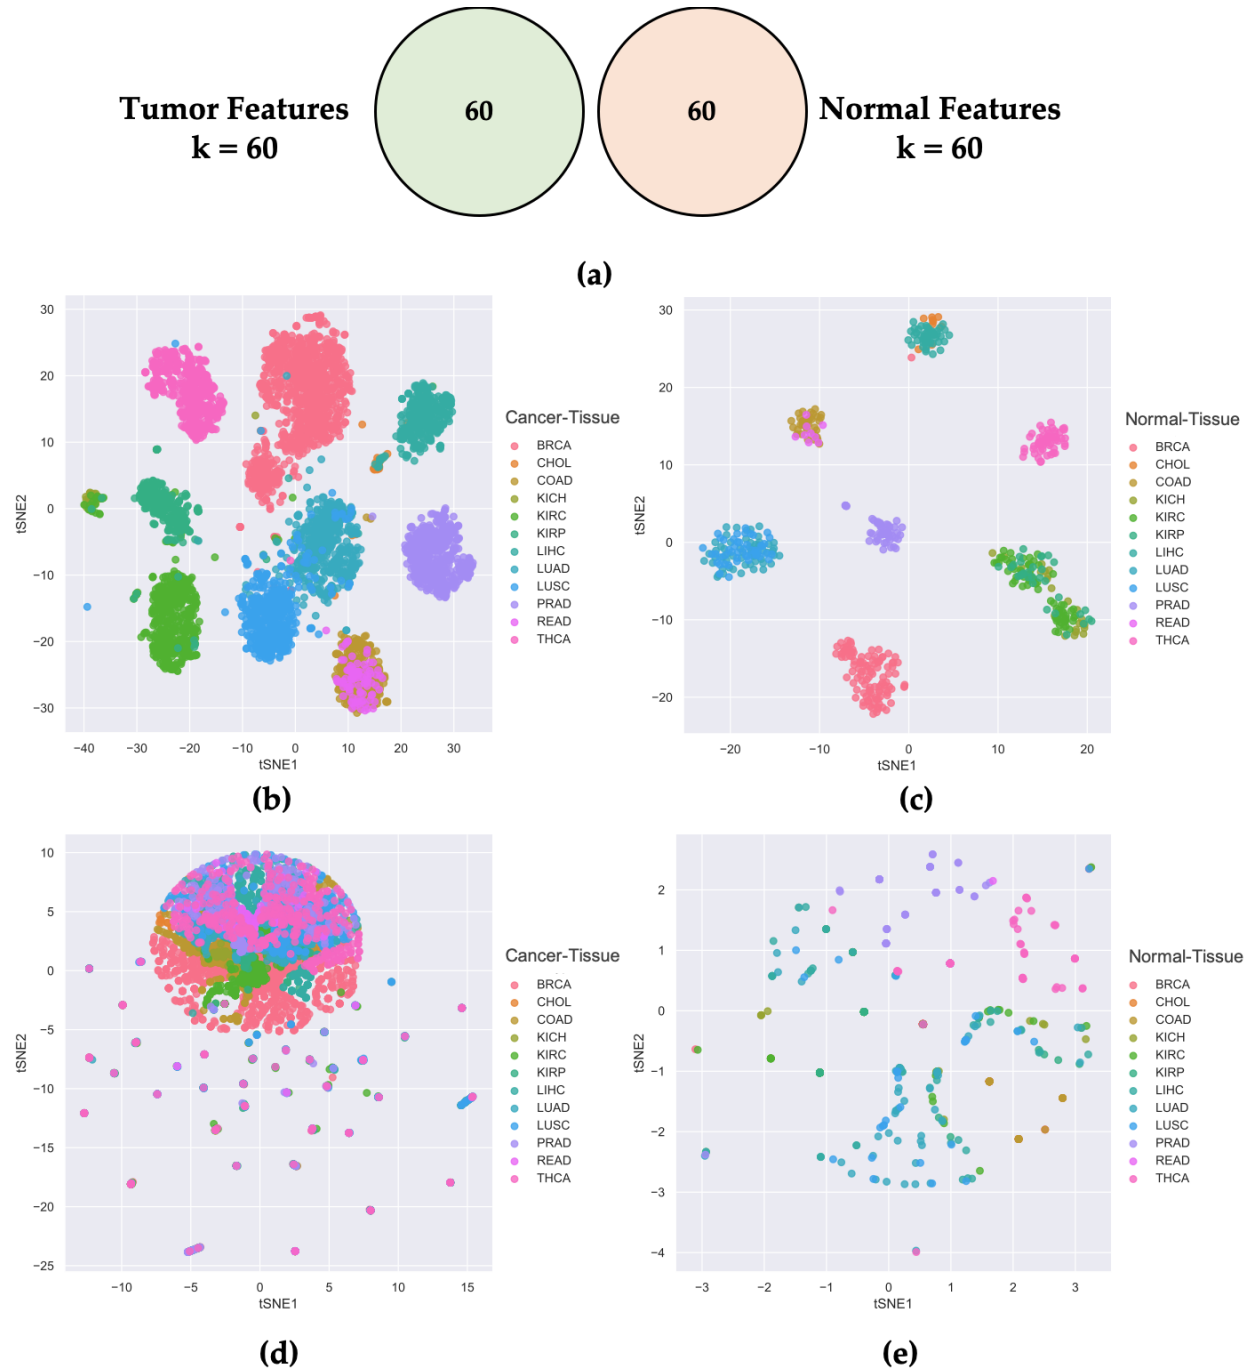

**Figure 2. Comparing tumor features with normal features.** a) Venn diagram of top 60 tumor features and top 60 normal features derived from CAE; b) t-SNE plot of tumor samples using tumor features; c) t-SNE plot of normal samples using normal features; d) t-SNE plot of tumor samples using normal features; e) t-SNE plot of normal samples using tumor features.

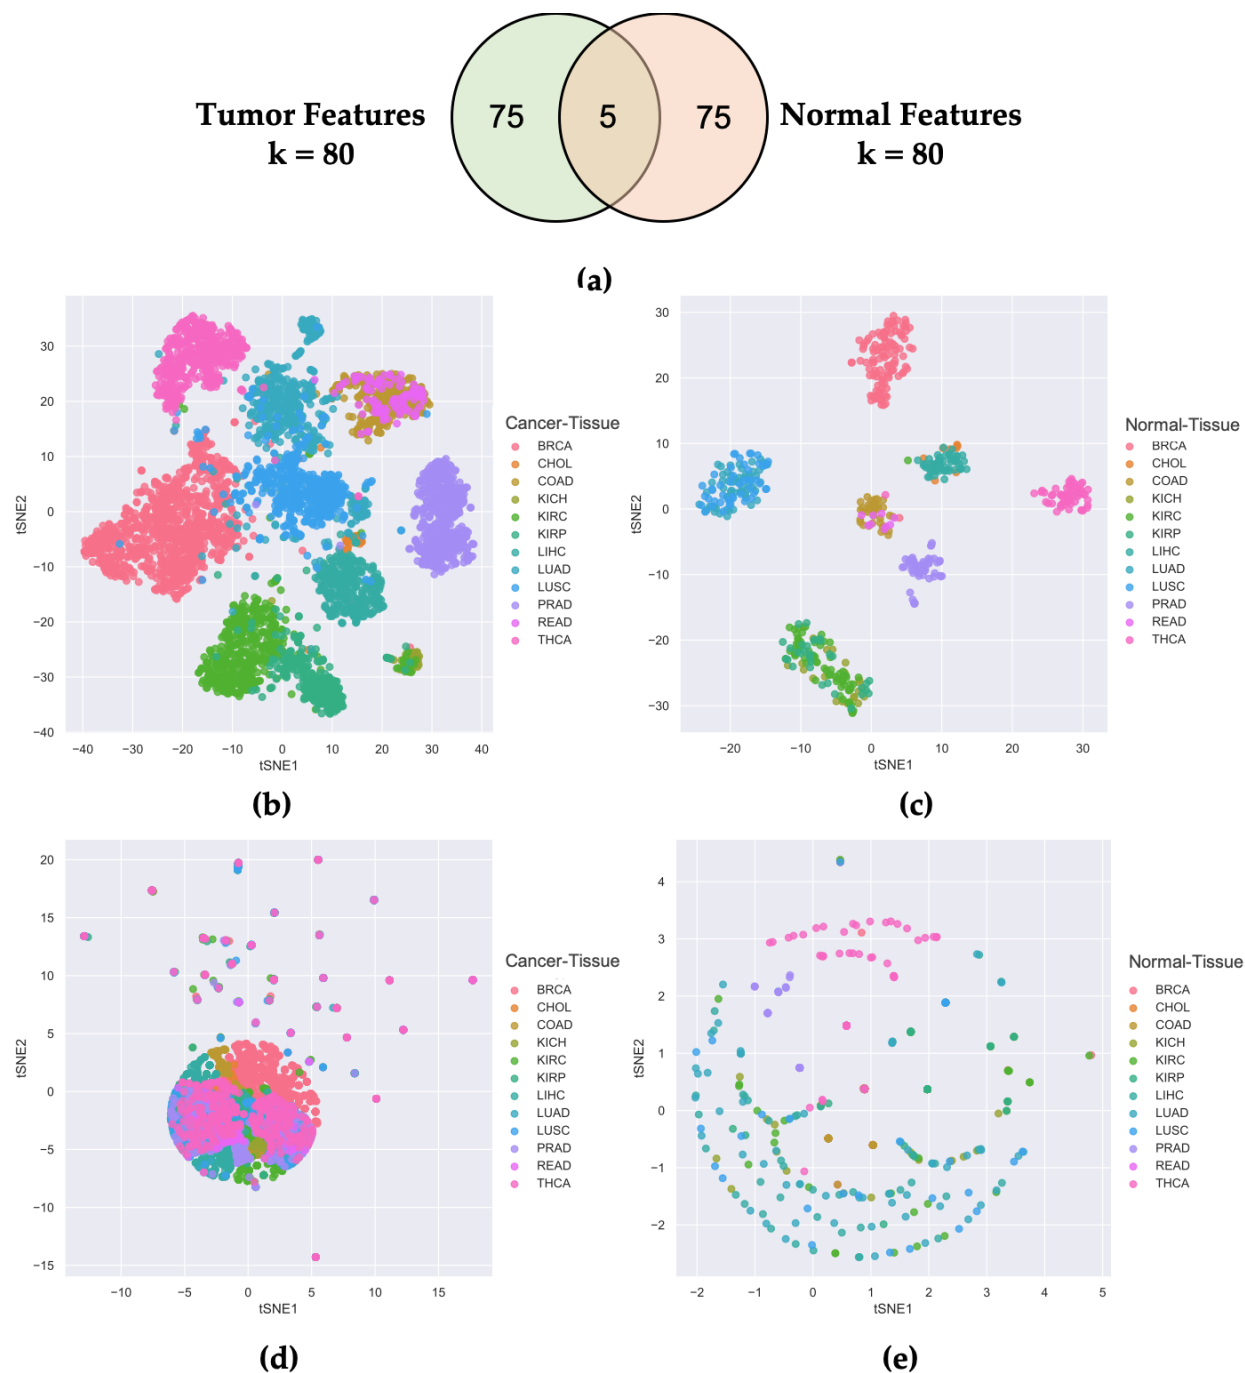

**Figure 3. Comparing tumor features with normal features.** a) Venn diagram of top 80 tumor features and top 80 normal features derived from CAE; b) t-SNE plot of tumor samples using tumor features; c) t-SNE plot of normal samples using normal features; d) t-SNE plot of tumor samples using normal features; e) t-SNE plot of normal samples using tumor features.
